# Supplementary material for: Phylogenetic Biogeography Inference Using Dynamic Paleogeography Models and Explicit Geographic Ranges
Source: bioRxiv or medRxiv preprint supplement (doi:10.1101/2023.11.16.567427), 2023-11-17
Supplement: Supplementary file [file media-1.pdf]

# Phylogenetic biogeography inference using dynamic paleogeography models and explicit geographic ranges

J. Salvador Arias<sup>1,2,\*</sup>

<sup>1</sup>*Unidad Ejecutora Lillo (CONICET-Fundación Miguel Lillo), S.M. de Tucumán, Tucumán, Argentina*

<sup>2</sup>*Current address: Laboratorio de Genética Evolutiva, Instituto de Biología Subtropical (CONICET-UnaM), Universidad Nacional de Misiones, Felix de Azara 1552, CP 3300, Posadas, Misiones, Argentina*

*\*Email correspondence: [jsalarias@gmail.com](mailto:jsalarias@gmail.com)*

## Supplementary Information

**Supplementary table 1.** Dispersals into North America. The node column indicates the node that contains the youngest part of the credibility interval (of 50%); refer to supplementary figure 3 to get the node IDs. The time frame column reports an approximation of the 50% credibility interval for the dispersal (i.e., the oldest to youngest dispersal instances). Events indicated as ambiguous indicate that there are alternative dispersal routes for these nodes.

| <b>Node</b> | <b>Time Frame 50% CI (Ma)</b> | <b>Source</b> | <b>Comments</b>              |
|-------------|-------------------------------|---------------|------------------------------|
| 149         | 68.7 – 15.0                   | Eurasia       | De Geer pass                 |
| 18          | 68.1 – 15.0                   | Eurasia       | De Geer pass                 |
| 30          | 40.0 – 15.0                   | Eurasia       | De Geer pass                 |
| 129         | 33.1 – 20.0                   | Eurasia       | De Geer pass                 |
| 4           | 30.0 – 10.0                   | Eurasia       | De Geer pass                 |
| 63          | 30.0 – 5.0                    | Eurasia       | De Geer pass                 |
| 9           | 29.3 – 10.0                   | Eurasia       | De Geer pass                 |
| 51          | 28.1 – 10.0                   | Eurasia       | De Geer pass                 |
| 69          | 24.3 – 10.0                   | Eurasia       | De Geer pass, or Bering pass |
| 138         | 15.0 – 0.0                    | Eurasia       | Bering pass, or De Geer pass |
| 273         | 15.0 – 5.0                    | Eurasia       | De Geer pass (ambiguous)     |
| 282         | 14.3 – 10.0                   | Eurasia       | De Geer pass (ambiguous)     |
| 56          | 10.0 – 5.0                    | Eurasia       | De Geer pass                 |

**Supplementary table 2.** Dispersals into South America. See supp. table 1 for an explanation of the columns.

| <b>Node</b> | <b>Time frame 50% CI (Ma)</b> | <b>Source</b> | <b>Comments</b>                                 |
|-------------|-------------------------------|---------------|-------------------------------------------------|
| 162         | 40.0 - 21.1                   | North America | Throu Central America (ambiguous)               |
| 177         | 40.0 - 10.0                   | North America | Throu Central America                           |
| 160         | 30.0 - 5.0                    | North America | Throu Central America (ambiguous)               |
| 167         | 30.0 - 5.0                    | North America | Throu Central America                           |
| 20          | 25.0 - 5.0                    | North America | Throu Central America and Caribbean (ambiguous) |
| 154         | 25.0 - 0.0                    | North America | Throu Central America and Caribbean             |
| 282         | 14.3 - 8.1                    | Africa        | Throu Atlantic ocean (ambiguous)                |
| 20          | 15.0 - 0.0                    | Africa        | Throu Atlantic ocean (ambiguous)                |
| 30          | 15.0 - 0.0                    | North America | Throu Central America and Caribbean             |
| 123         | 15.0 - 0.0                    | Africa        | Throu Atlantic ocean                            |
| 131         | 15.0 - 0.0                    | North America | Throu Central America and Caribbean             |
| 151         | 15.0 - 0.0                    | North America | Throu Central America                           |

|     |            |                            |                                                       |
|-----|------------|----------------------------|-------------------------------------------------------|
|     |            |                            | and Caribbean                                         |
| 153 | 15.0 - 0.0 | North America              | Throu Central America<br>and Caribbean                |
| 171 | 15.0 - 0.0 | North America              | Throu Central America<br>and Caribbean                |
| 176 | 10.0 - 0.0 | North America              | Throu Central America<br>and Caribbean                |
| 273 | 10.0 - 0.0 | North America or<br>Africa | Throu Atlantic ocean,<br>or Caribbean                 |
| 283 | 8.1 - 5.0  | North America              | Throu Central America<br>and Caribbean<br>(ambiguous) |
| 286 | 7.7 - 2.3  | North America              | Throu Central America<br>and Caribbean<br>(ambiguous) |

**Supplementary table 3.** Dispersals into Africa. See supp. table 1 for an explanation of the columns.

| <b>Node</b> | <b>Time frame 50% CI (Ma)</b> | <b>Source</b> | <b>Comments</b>                                         |
|-------------|-------------------------------|---------------|---------------------------------------------------------|
| 144         | 50.0 - 30.6                   | Eurasia       | Throu eastern Mediterranean (ambiguous)                 |
| 172         | 35.0 - 10.0                   | Eurasia       | Throu wastern Mediterranean, or eastern Mediterranean   |
| 191         | 35.0 - 18.1                   | Eurasia       | Throu Anatolia, Iran, and Arabian peninsula             |
| 107         | 35.0 - 5.0                    | Eurasia       | Throu eastern Mediterranean                             |
| 121         | 34.3 - 5.0                    | Eurasia       | Throu eastern Mediterranean                             |
| 106         | 30.0 - 5.0                    | Eurasia       | Throu Anatolia, Iran, and Arabian peninsula             |
| 145         | 30.0 - 5.0                    | Eurasia       | Throu western Mediterranean (ambiguous)                 |
| 146         | 30.0 - 5.0                    | Eurasia       | Throu eastern Mediterranean (ambiguous)                 |
| 10          | 29.3 - 15.0                   | Eurasia       | Throu eastern Mediterranean (ambiguous)                 |
| 20          | 25.0 - 10.0                   | Eurasia       | Throu western Mediterranean (ambiguous)                 |
| 25          | 25.0 - 5.0                    | Eurasia       | Throu Anatolia, Iran, and Arabian peninsula             |
| 133         | 25.0 - 5.0                    | Eurasia       | Throu Anatolia, Iran, and Arabian peninsula (ambiguous) |
| 23          | 25.0 - 0.0                    | Eurasia       | Throu Anatolia, Iran, and Arabian peninsula             |
| 100         | 20.0 - 3.1                    | Eurasia       | Throu Anatolia and Arabian peninsula                    |
| 26          | 20.0 - 0.0                    | Eurasia       | Throu Anatolia, Iran, and Arabian peninsula             |
| 89          | 20.0 - 0.0                    | Eurasia       | Throu Anatolia and Arabian peninsula                    |
| 7           | 19.3 - 5.0                    | Eurasia       | Throu Anatolia, Iran, and Arabian peninsula             |
| 272         | 18.1 - 6.9                    | Eurasia       | Throu Anatolia, Iran, and Arabian peninsula             |

|     |           |                         |              |
|-----|-----------|-------------------------|--------------|
| 218 | 0.6 - 0.0 | Kerguelen or<br>Eurasia | Indian ocean |
|-----|-----------|-------------------------|--------------|

**Supplementary table 4.** Dispersals into Madagascar. See supp. table 1 for an explanation of the columns.

| <b>Node</b> | <b>Time frame 50% CI (Ma)</b> | <b>Source</b>   | <b>Comments</b>           |
|-------------|-------------------------------|-----------------|---------------------------|
| 25          | 10.0 - 0.0                    | Africa          | Throu Monzambique channel |
| 193         | 10.0 - 0.0                    | Africa          | Throu Monzambique channel |
| 201         | 10.0 - 0.0                    | Africa          | Throu Monzambique channel |
| 202         | 10.0 - 0.0                    | Africa          | Throu Monzambique channel |
| 206         | 10.0 - 0.0                    | Africa          | Throu Monzambique channel |
| 207         | 10.0 - 0.0                    | Africa          | Throu Monzambique channel |
| 13          | 9.6 - 0.0                     | Africa          | Throu Monzambique channel |
| 15          | 5.0 - 0.0                     | Africa          | Throu Monzambique channel |
| 16          | 5.0 - 0.0                     | Africa          | Throu Monzambique channel |
| 28          | 5.0 - 0.0                     | Africa          | Throu Monzambique channel |
| 133         | 5.0 - 0.0                     | Africa or Inida | Throu Monzambique         |

|     |           |         |                              |
|-----|-----------|---------|------------------------------|
|     |           |         | channel, or Indian<br>ocean  |
| 173 | 5.0 - 0.0 | Africa  | Throu Monzambique<br>channel |
| 174 | 5.0 - 0.0 | Africa  | Throu Monzambique<br>channel |
| 195 | 5.0 - 0.0 | Africa  | Throu Monzambique<br>channel |
| 198 | 5.0 - 0.0 | Africa  | Throu Monzambique<br>channel |
| 204 | 5.0 - 0.0 | Africa  | Throu Monzambique<br>channel |
| 277 | 5.0 - 0.0 | Africa  | Throu Monzambique<br>channel |
| 278 | 5.0 - 0.0 | Africa  | Throu Monzambique<br>channel |
| 280 | 0.6 - 0.0 | Eurasia | Indian ocean                 |

**Supplementary table 5.** Dispersals into Australia and New Guinea. See supp. table 1 for an explanation of the columns.

| <b>Node</b> | <b>Time frame 50% CI (Ma)</b> | <b>Source</b> | <b>Comments</b>                |
|-------------|-------------------------------|---------------|--------------------------------|
| 212         | 20.0 - 5.0                    | Eurasia       | Throu Malesia                  |
| 239         | 19.3 - 0.0                    | Eurasia       | Throu Malesia                  |
| 38          | 15.0 - 5.0                    | Eurasia       | Throu Malesia                  |
| 216         | 15.0 - 5.0                    | Eurasia       | Throu Malesia                  |
| 229         | 5.0 - 0.0                     | Eurasia       | Throu Malesia                  |
| 40          | 15.0 - 0.0                    | Eurasia       | Throu Malesia                  |
| 43          | 15.0 - 0.0                    | Eurasia       | Throu Malesia                  |
| 210         | 15.0 - 0.0                    | Eurasia       | Throu Malesia                  |
| 268         | 14.3 - 0.0                    | Eurasia       | Throu Malesia                  |
| 271         | 12.5 - 5.0                    | Eurasia       | Throu Malesia                  |
| 270         | 12.5 - 0.0                    | Eurasia       | Throu Malesia                  |
| 226         | 9.3 - 5.0                     | Eurasia       | Throu Malesia                  |
| 37          | 10.0 - 0.0                    | Eurasia       | Throu Malesia                  |
| 42          | 10.0 - 0.0                    | Eurasia       | Throu Malesia, skip New Guinea |
| 234         | 10.0 - 0.0                    | Eurasia       | Throu Malesia                  |
| 237         | 10.0 - 0.0                    | Eurasia       | Throu Malesia                  |



|     |            |         |               |
|-----|------------|---------|---------------|
| 265 | 10.0 - 0.0 | Eurasia | Throu Malesia |
| 266 | 10.0 - 0.0 | Eurasia | Throu Malesia |
| 6   | 5.0 - 0.0  | Eurasia | Throu Malesia |
| 222 | 5.0 - 0.0  | Eurasia | Throu Malesia |
| 232 | 5.0 - 0.0  | Eurasia | Throu Malesia |
| 281 | 0.6 - 0.0  | Eurasia | Throu Malesia |

---

**Supplementary table 6.** Dispersals into New Caledonia. See supp. table 1 for an explanation of the columns.

| <b>Node</b> | <b>Time frame 50% CI (Ma)</b> | <b>Source</b>           | <b>Comments</b> |
|-------------|-------------------------------|-------------------------|-----------------|
| 38          | 5.0 - 0.0                     | Australia or New Guinea |                 |
| 213         | 5.0 - 0.0                     | Australia or New Guinea |                 |
| 216         | 5.0 - 0.0                     | Australia or New Guinea |                 |
| 229         | 5.0 - 0.0                     | Australia or New Guinea |                 |
| 247         | 5.0 - 0.0                     | Australia               |                 |
| 258         | 5.0 - 0.0                     | Australia               |                 |
| 271         | 5.0 - 0.0                     | Australia or New Guinea |                 |
| 260         | 3.7 - 0.0                     | Australia               |                 |
| 261         | 3.7 - 0.0                     | Australia               |                 |
| 219         | 0.6 - 0.0                     | Kerguelen or Eurasia    | Throu Malesia   |

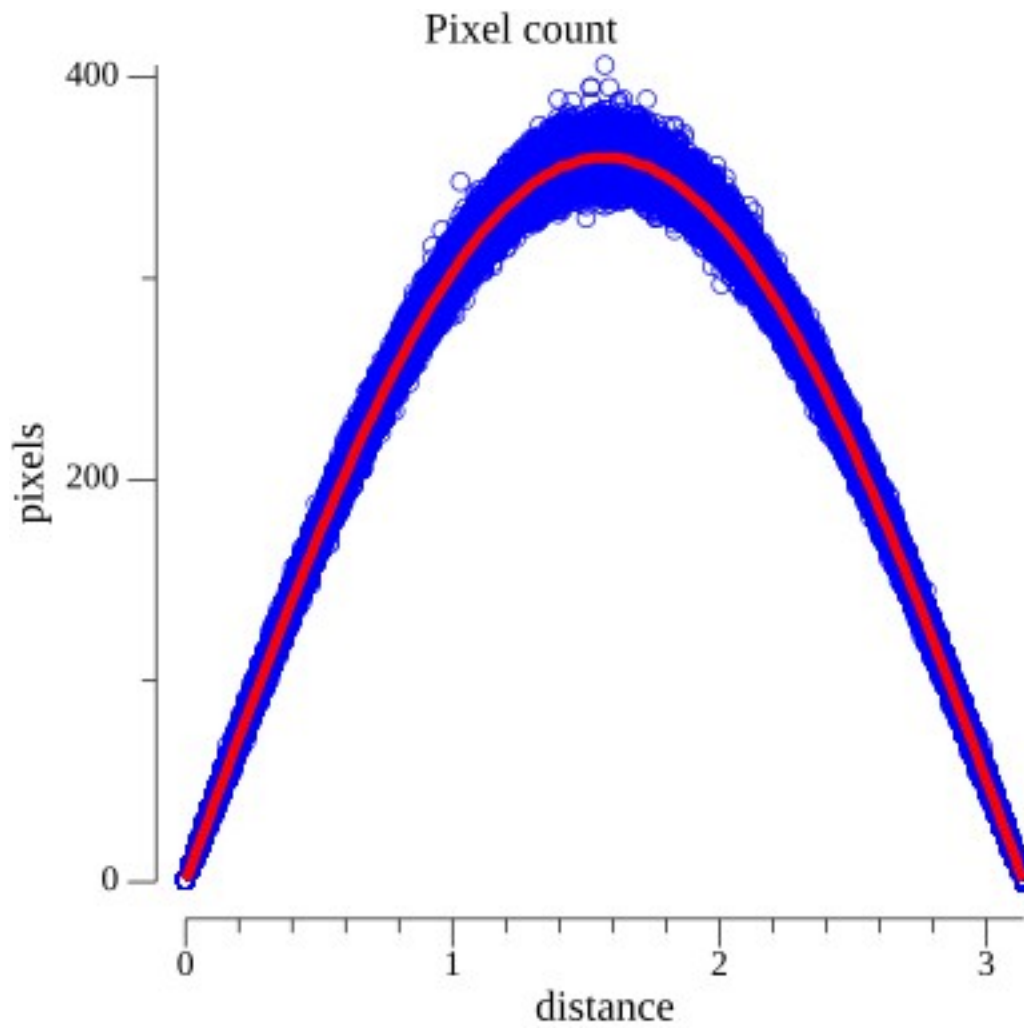

**Supplementary figure 1.** Plot of the number of pixels at a given distance (in radians) from 20 random pixels in each ring of an e360 pixelation used in this paper; the pixelation has 180 rings (for a total of 3600 sampled pixels). In red is the number of pixels at a given distance from the North Pole, which is used for quick approximations of the spherical normal in the likelihood calculations.

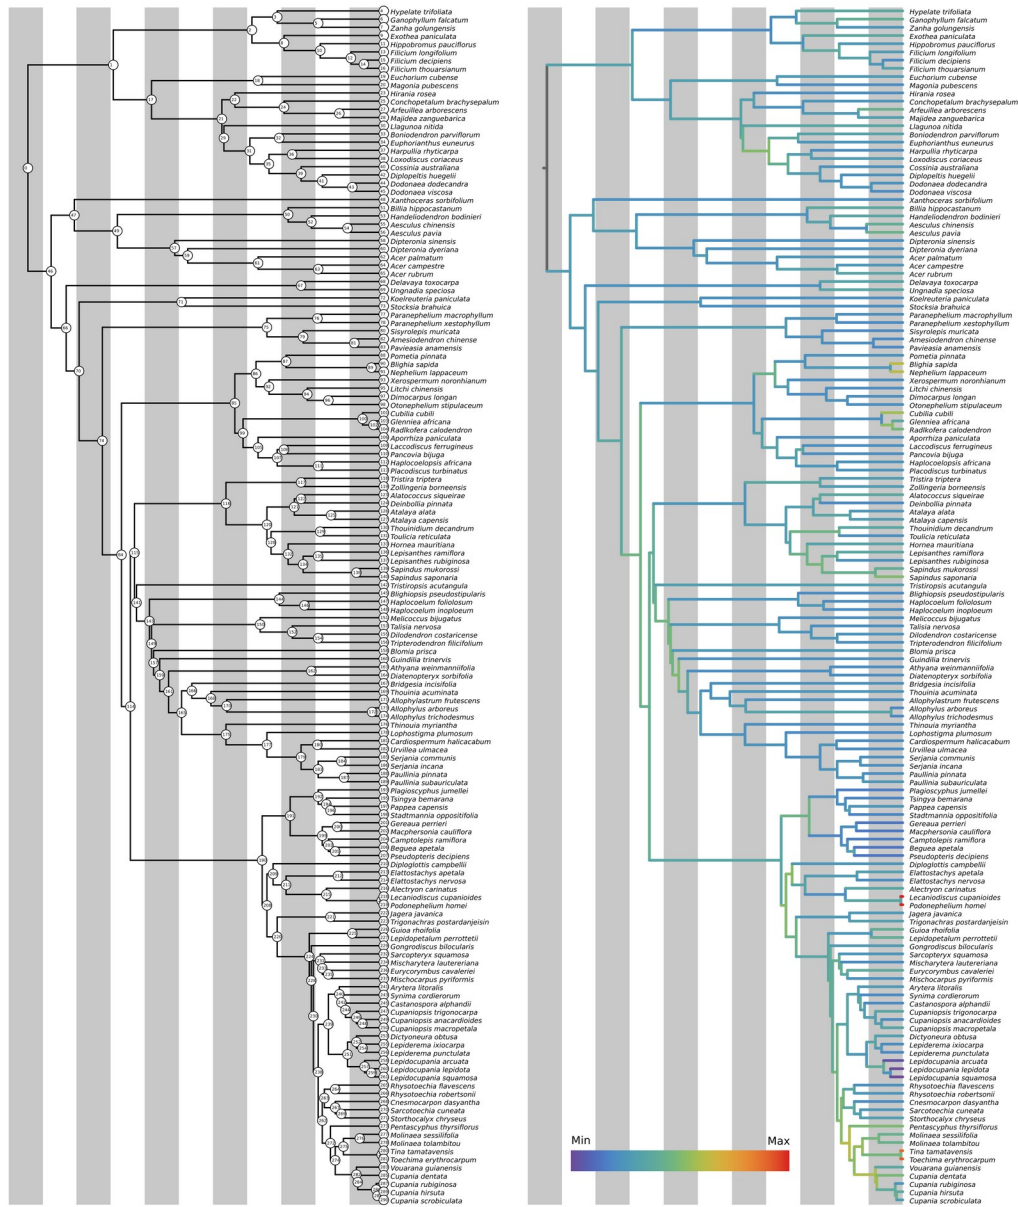

**Supplementary figure 2.** Phylogenetic relationships of Sapindaceae used in this work. On the left, the tree with the node numbers indicated; on the right, the same tree with the branches colored by its average speed (in Km/My) log10 scaled.

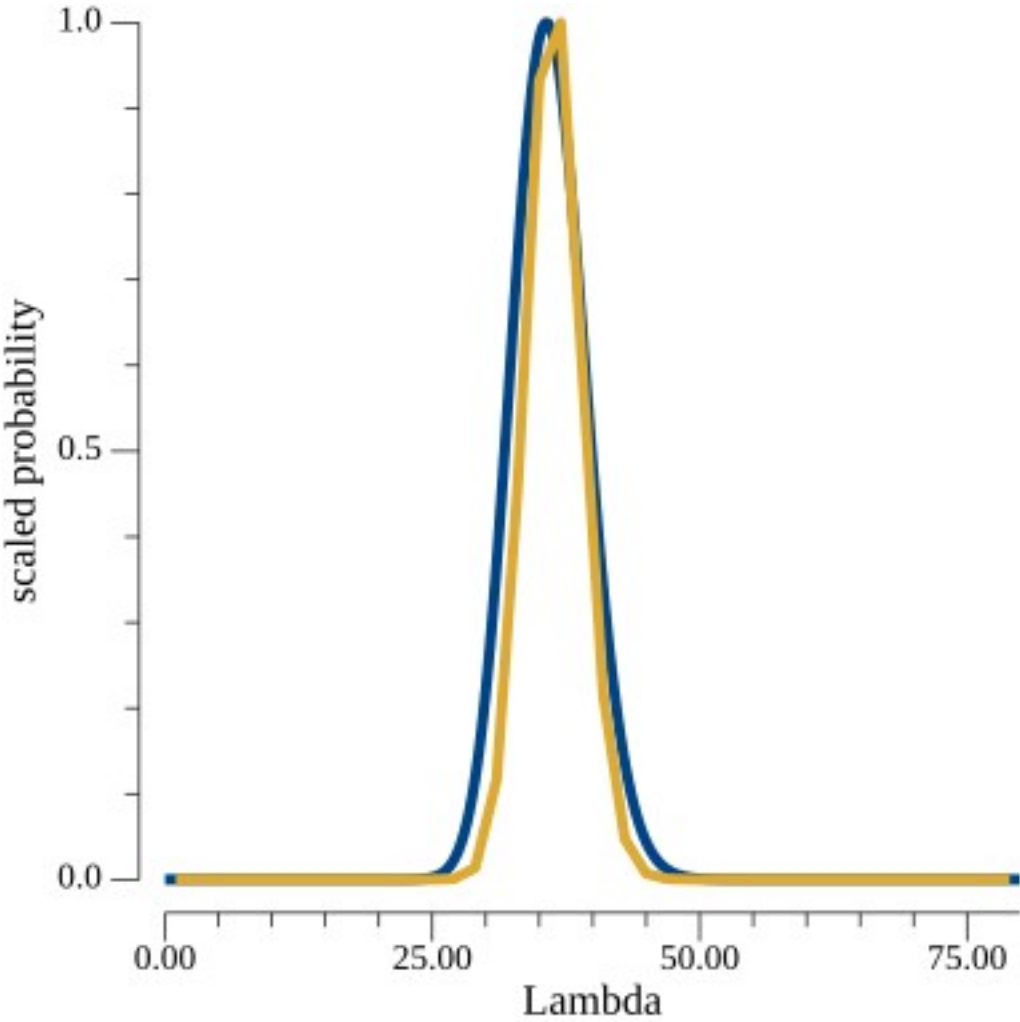

**Supplementary figure 3.** In yellow, the estimated posterior distribution of the  $\lambda$  parameter (using a flat uniform prior) for the Sapindaceae data set; in blue, the gamma distribution ( $\alpha = 108.0$  and  $\beta = 3.0$ ) used to approximate the posterior distribution.

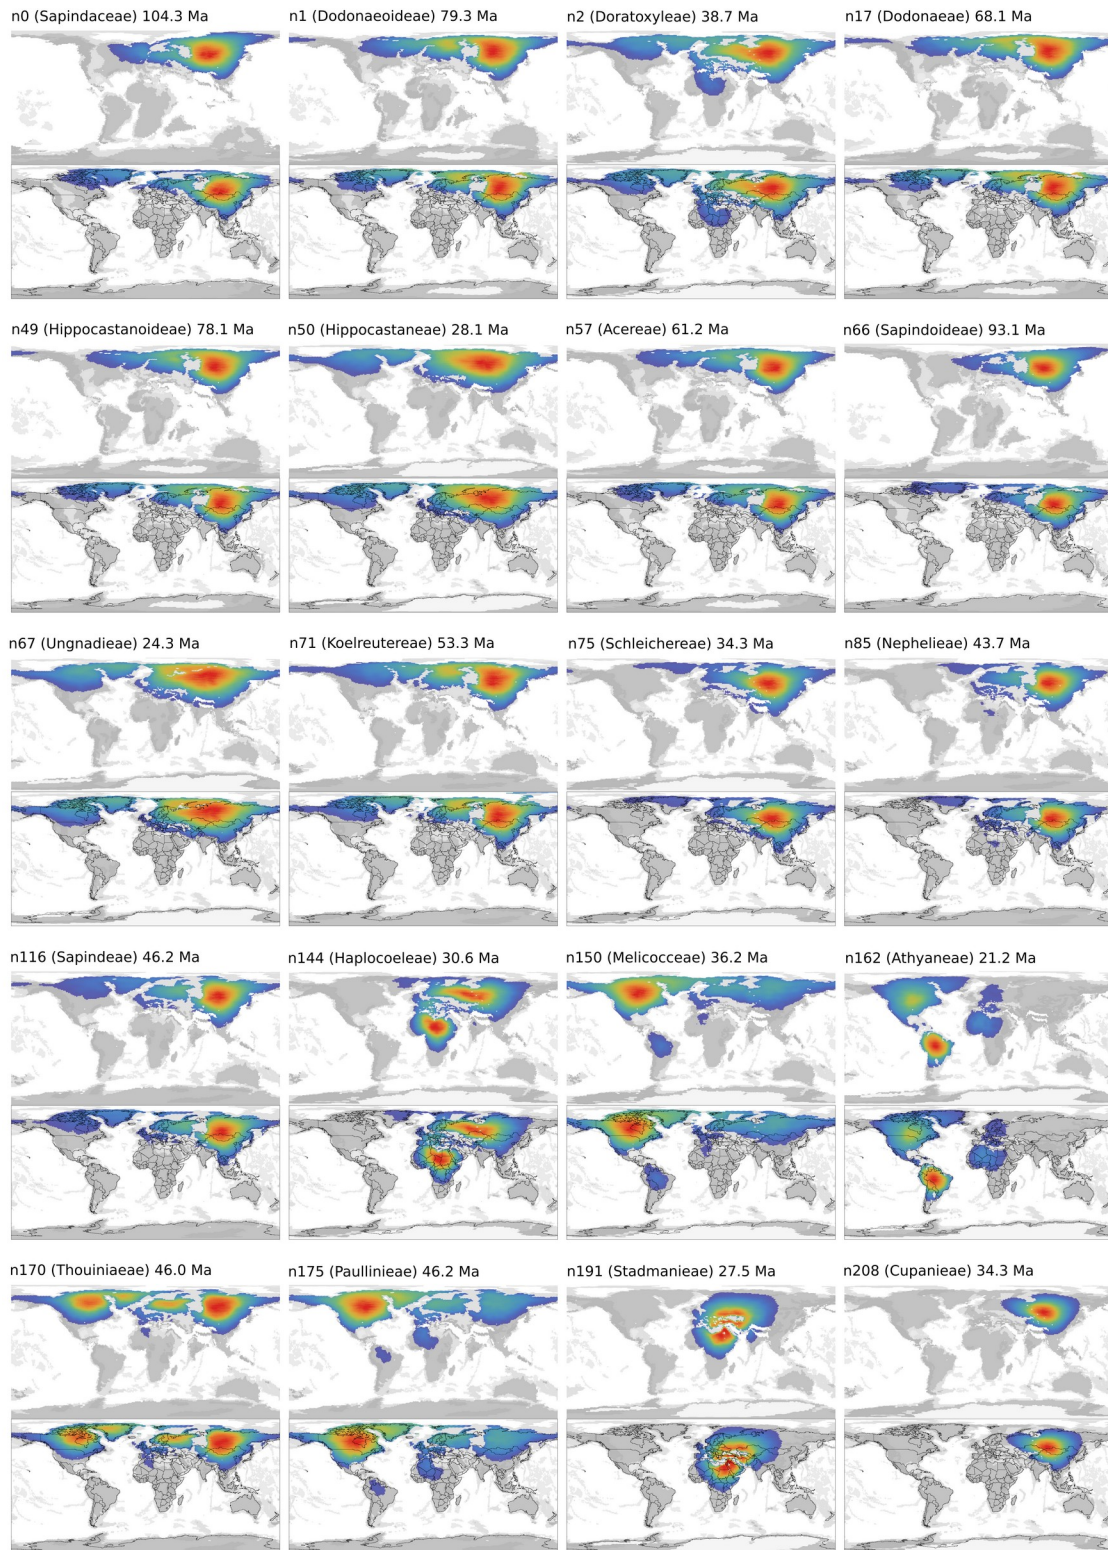

**Supplementary figure 4.** *Pixel posterior probabilities for the nodes assigned to the family, subfamily, and tribal ranks. Monogeneric groups are not displayed. For the node IDs, see supplementary figure 3.*
